# Supplementary material for: Association Between Multimorbidity and Quality of Life Among Older Adults in Community-Dwelling of Uttar Pradesh, India
Source: Research Square preprint supplement (doi:10.21203/rs.3.rs-882397/v1), 2021-09-22
Supplement: Supplementary file 2 [file 0ddcc31621b30d10b258f220.docx]

**Appendix A. WHOQOL-BREF framework**

**Physical health**

- Pain
- Medical treatment
- Energy
- Discomfort
- Sleep
- Ability to perform
- Capacity to work

**Environment**

- Safety
- Physical environment
- Financial resources
- Daily Information
- Leisure
- Home Environment
- Health care
- Transport

**Psychological health**

- Life enjoyment
- Meaning of life
- Concentrating
- Body appearance
- Satisfy with yourself
- Negative feeling

**Social Relationship**

- Personal
- Sexual
- Social Support

***Source: Based on World Health Organization Quality of Life framework, 1997***

**Appendix B: WHOQoL-BREF item-wise mean raw score among the study population of Varanasi, Uttar Pradesh (N=500)**

| **WHOQOL-BREF Item/Domains** | **Direction of Scaling** | **Mean Raw item score** | | **Standard Deviation(SD)** |
| --- | --- | --- | --- | --- |
| Q1. Overall quality of life | **+** | 3.28 | 0.86 | |
| Q2. General Health | **+** | 3.53 | 0.95 | |
| **Domain 1: Physical Health (7-item)** |  |  |  | |
| Q3. Pain | **-** | 3.27 | 0.95 | |
| Q4. Medical treatment | **-** | 3.75 | 1.05 | |
| Q10. Enough energy | **+** | 3.13 | 0.96 | |
| Q15. Discomfort | **+** | 3.15 | 0.98 | |
| Q16. Sleep | **+** | 3.34 | 1.26 | |
| Q17. Ability to perform daily living activities | **+** | 3.17 | 0.85 | |
| Q18. Capacity to work | **+** | 3.13 | 0.93 | |
| **Domain 2: Psychological Health (6-item)** |  |  |  | |
| Q5. Life enjoyment | **+** | 3.21 | 0.89 | |
| Q6. Meaningfulness of life | **+** | 3.41 | 1.08 | |
| Q7. Thinking, learning, memory and concentration | **+** | 3.15 | 1.04 | |
| Q11. Body appearance | **+** | 3.21 | 1.02 | |
| Q19. Satisfy with yourself | **+** | 3.37 | 1.05 | |
| Q26. Negative feelings | **-** | 4.04 | 0.95 | |
| **Domain 3: Social Relationship (3-item)** |  |  |  | |
| Q20. Personal relationship | **+** | 3.73 | 1.01 | |
| Q21. Sexual activity | **+** | 0.9 | 1.48 | |
| Q22. Social support | **+** | 3.25 | 0.92 | |
| **Domain 4: Environmental Health (8-item)** |  |  |  | |
| Q8. Freedom, physical safety and security | **+** | 3.36 | 1.04 | |
| Q9. Physical environment | **+** | 3.32 | 1.01 | |
| Q12. Financial resources | **+** | 2.96 | 1.02 | |
| Q13. Daily information | **+** | 3.12 | 0.94 | |
| Q14. Leisure | **+** | 3.10 | 1.05 | |
| Q23. Home environment | **+** | 3.20 | 0.93 | |
| Q24. Access to health care | **+** | 3.21 | 1.03 | |
| Q25. Transport | **+** | 3.19 | 1.04 | |
